# Supplementary material for: High loading BaTiO3 nanoparticles chemically bonded with fluorinated silicone rubber for largely enhanced dielectric properties of polymer nanocomposites
Source: Royal Society of Chemistry journal article supplement (doi:10.1039/d1cp04040e), 2021-01-01
Supplement: d1cp04040e1.pdf [file d1cp04040e1.pdf]

## Supporting Information

### **High loading BaTiO<sub>3</sub> nanoparticles chemically bonded with fluorinated silicone rubber for largely enhanced dielectric properties of polymer nanocomposites**

Fang-Yan Du <sup>a</sup>, Rui-Chao Chen <sup>a</sup>, Junjin Che <sup>b</sup>, Wei-Di Xu <sup>a</sup>, Xiu Liu <sup>a</sup>, Yin-Tao Li <sup>a</sup>, Yuan-Lin Zhou <sup>a</sup>, Jinkai Yuan <sup>b\*</sup>, Quan-Ping Zhang <sup>a\*</sup>

<sup>a</sup> *State Key Laboratory of Environment-friendly Energy Materials, School of Materials Science and Engineering, Southwest University of Science and Technology, Mianyang 621010, China*

<sup>b</sup> *Centre de Recherche Paul Pascal, CNRS, University of Bordeaux, UMR5031, 33600 Pessac, France*

---

Corresponding authors: Jinkai Yuan; Quan-Ping Zhang  
E-mails: jinkai.yuan@crpp.cnrs.fr; zhangqp@swust.edu.cn

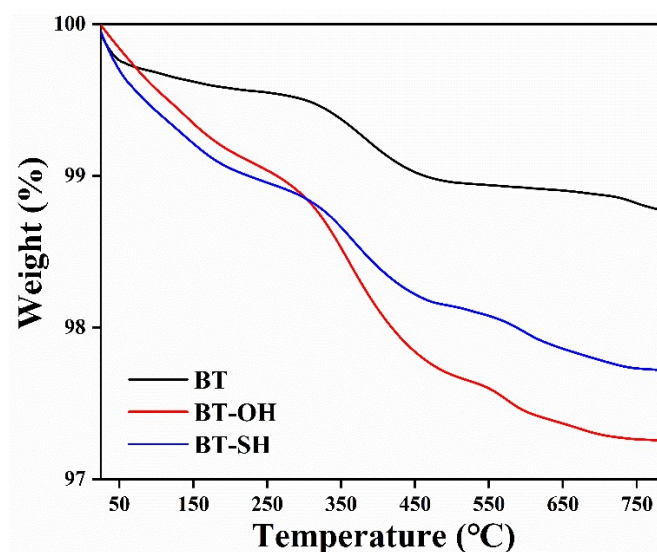

Figure S1. TGA spectrum of the BT, BT-OH and BT-SH nanoparticles.

Table S1 TG data and grafting density of BT, BT-OH and BT-SH

|       | Weight loss | Grafting ratio/<br>(group nm <sup>-2</sup> ) |
|-------|-------------|----------------------------------------------|
| BT    | 1.2%        | -                                            |
| BT-OH | 2.1%        | 32.6                                         |
| BT-SH | 2.7%        | 10.3                                         |

Weight loss of BT, BT-OH and BT-SH nanoparticles are determined by TGA, as shown in **Figure S1** and **Table S1**. According to the method in literature <sup>[3]</sup>, the grafting density of BT-OH and BT-SH nanoparticles are calculated based on the weight loss and molar mass of grafting groups. Considering each nanoparticle as a sphere with  $d=100\text{nm}$ , and product of KH580 after decomposition as neat  $\text{SiO}_2$ . The molar mass of hydroxyl groups, KH580,  $\text{SiO}_2$  and  $\text{BaTiO}_3$  are  $17\text{ g mol}^{-1}$ ,  $238\text{ g mol}^{-1}$ ,  $60\text{ g mol}^{-1}$  and  $233\text{ g mol}^{-1}$ , respectively. The structure of BT unit cell is cubic with  $a=b=c=0.395\text{nm}$ .

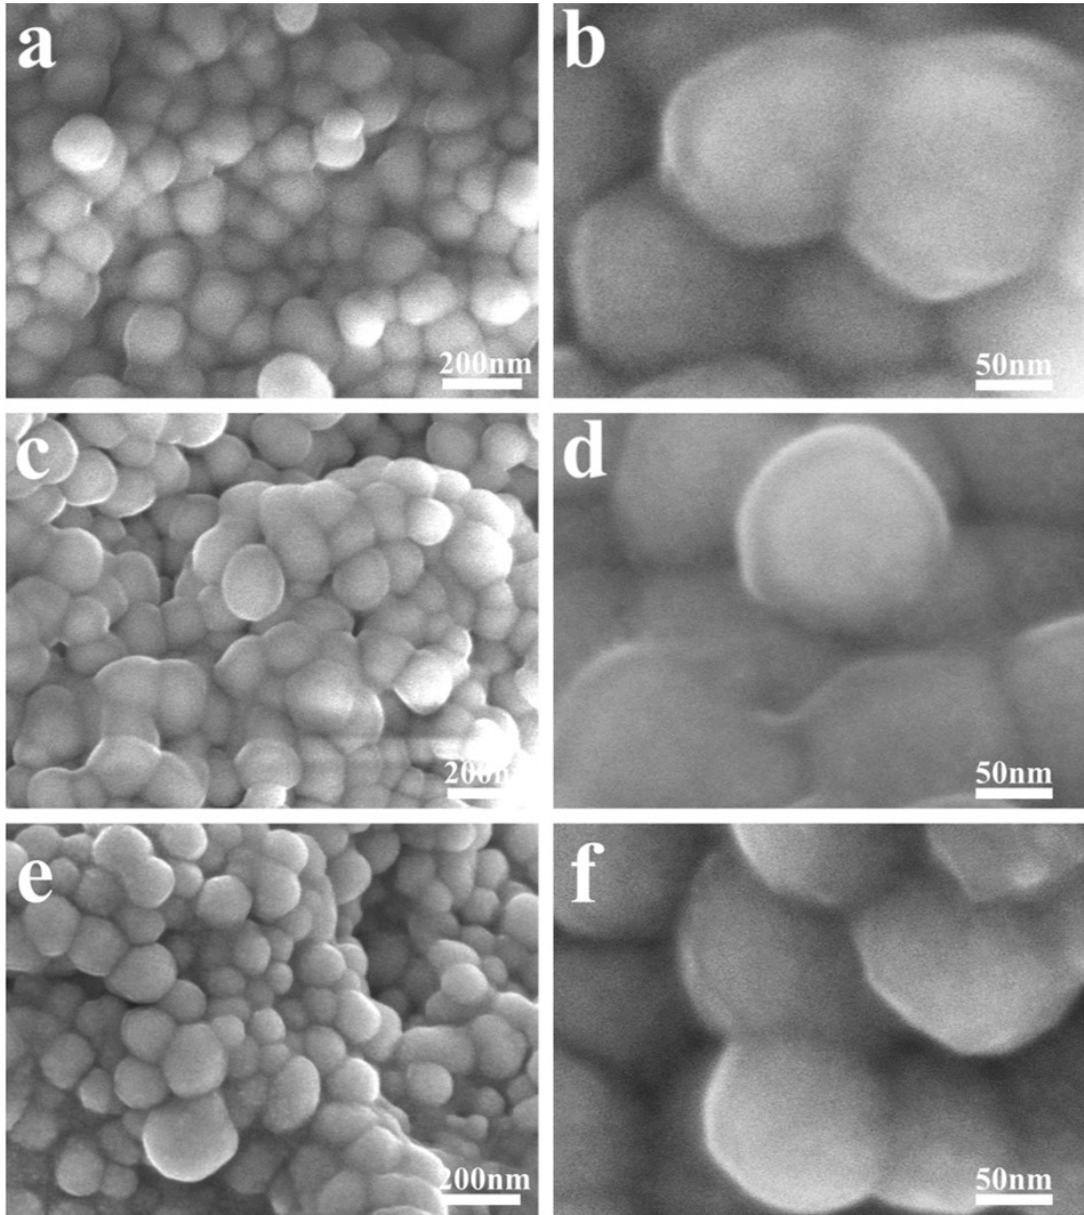

**Figure S2 SEM images of the BT/FSR nanocomposites with the loading of 82 wt.% (a, b), 86 wt.% (c, d) and 90 wt.% (e, f).**

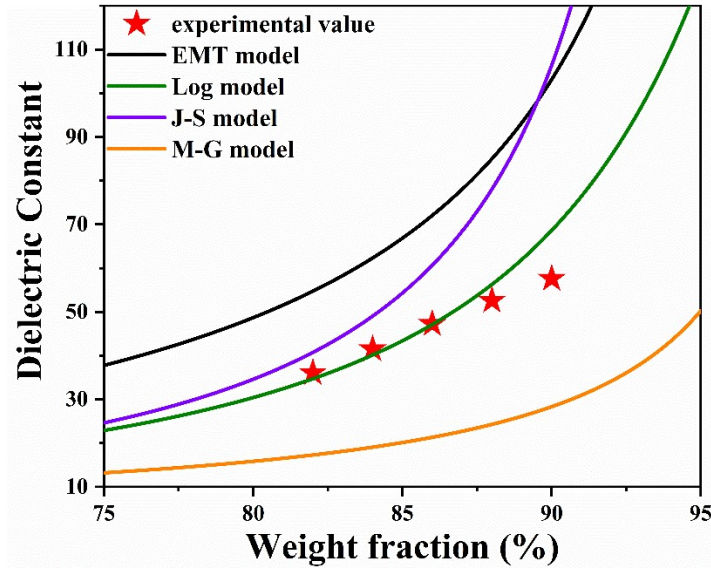

Figure S3. Plots of dielectric constants versus weight fraction ( $\rho_{BT}=6.08g/cm^3$ ,  $\rho_{FSR}=1.2g/cm^3$ ) with various models for polymer-based composites. For calculation, dielectric constants of BT ( $\epsilon=300$ ) and FSR ( $\epsilon=5$ ) were applied as dielectric constants of filler and matrix. The shape factor ( $n=0.09$ ) in EMT model was obtained from BT/VSR composites in former study.

Table S2 Theoretical models for predicting the dielectric constants of polymer composites

| Models    | Equations                                                                                                                                                                                                                                                                                                                                                                |
|-----------|--------------------------------------------------------------------------------------------------------------------------------------------------------------------------------------------------------------------------------------------------------------------------------------------------------------------------------------------------------------------------|
| EMT model | $\epsilon = \epsilon_M \left[ 1 + \frac{vol_F \% (\epsilon_F - \epsilon_M)}{\epsilon_M + n vol_M \% (\epsilon_F - \epsilon_M)} \right]_{[1]}$                                                                                                                                                                                                                            |
| Log model | $\epsilon = e^{vol_F \% \ln \epsilon_F + vol_M \% \ln \epsilon_M} [2]$                                                                                                                                                                                                                                                                                                   |
| J-S model | $\epsilon = \frac{\epsilon_M (1 - vol_F \%) + \epsilon_F vol_F \% \frac{3\epsilon_M}{\epsilon_F + \epsilon_M} \left[ 1 + \frac{3vol_F \% (\epsilon_F - \epsilon_M)}{\epsilon_F + \epsilon_M} \right]}{(1 - vol_F \%) + vol_F \% \frac{3\epsilon_M}{\epsilon_F + \epsilon_M} \left[ 1 + \frac{3vol_F \% (\epsilon_F - \epsilon_M)}{\epsilon_F + \epsilon_M} \right]} [2]$ |
| M-G model | $\epsilon = \epsilon_M \frac{\epsilon_F (2vol_F \% + 1) + 2\epsilon_M (1 - vol_F \%)}{\epsilon_F (1 - vol_F \%) + \epsilon_M (2 + vol_F \%)} [2]$                                                                                                                                                                                                                        |

Figure S3 shows the experimental dielectric constants of BT/FSR

nanocomposites attached with expectation value of a series of theoretical models. A phenomenon can be noticed that the EMT model fails to match with the experimental value, while the Log and J-S model show good agreement.

## **Reference**

- [1] C. P. Wong, T. Marinis, Q. Jianmin and R. Yang, *IEEE Transactions on Components and Packaging Technologies*, 2000, 23, 680-683.
- [2] S. Luo, Y. Shen, S. Yu, Y. Wan, W.-H. Liao, R. Sun and C.-P. Wong, *Energy & Environmental Science*, 2017, 10, 137-144.
- [3] K. Yang, X. Huang, M. Zhu, L. Xie, T. Tanaka and P. Jiang, *ACS Appl. Mater. Interfaces*, 2014, 6, 1812-1822.
